# Supplementary material for: Impact of pregnancy and risk factors for ventricular arrhythmias in women with tetralogy of Fallot
Source: PubMed Central journal article supplement — Open Heart. 2021 Jan 7;8(1):e001400. doi: 10.1136/openhrt-2020-001400 (PMC7797246; doi:10.1136/openhrt-2020-001400), 2021-01-07

**GRAPHICAL ABSTRACT:** Impact of pregnancy in tetralogy of Fallot (TOF).

In a population of 80 surgically corrected TOF women, 55 had experienced pregnancy. Most of VA cases were found among TOF women with history of pregnancy, which was associated with higher prevalence of VA, independently of age at arrhythmic event. NT-proBNP value >321 ng/L was also an age independent risk marker of VA. NT-proBNP=N-terminal pro-brain natriuretic peptide; TOF=tetralogy of Fallot; VA=ventricular arrhythmias.

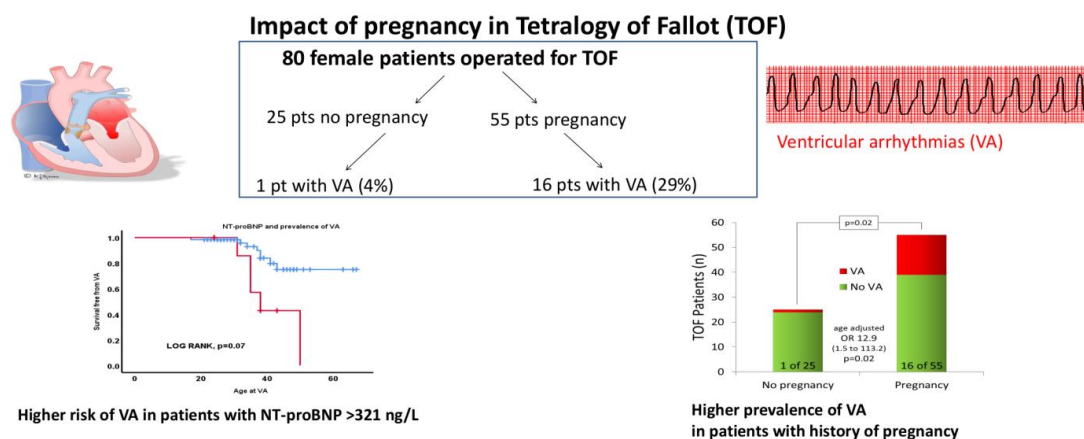

Supplement: openhrt-2020-001400supp001.pdf [file openhrt-2020-001400supp001.pdf]
